# Supplementary material for: Relationship between learner creativity, task planning, and speaking performance in L2 narrative tasks
Source: publisher site journal article supplement (doi:10.1515/iral-2023-0252), 2024-05-22
Supplement: Supplementary file 1 [file j_iral-2023-0252_suppl_001.docx]

**Supporting Information**

**A.** **Sample picture strips for *A boy, a dog and a frog***

**(Mayer 1967)**


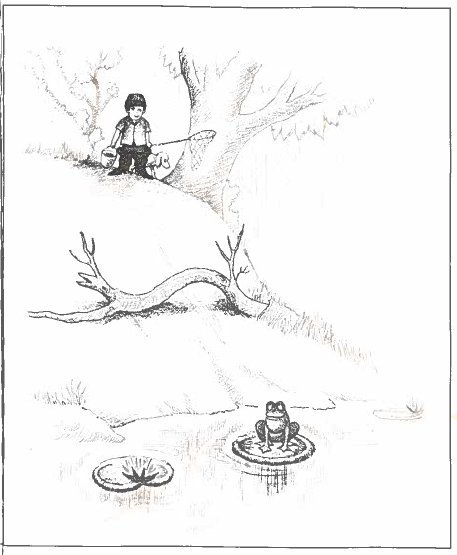

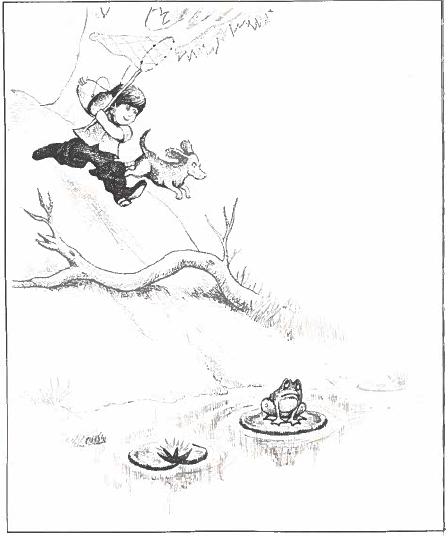


2

11

**B. Sample picture strips for *Frog, where are you?***

**(Mayer 1969)**


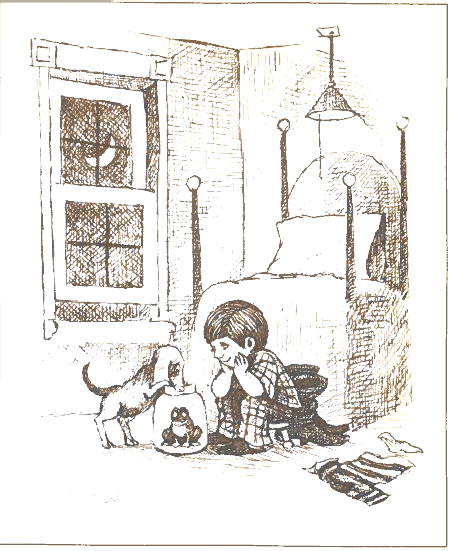

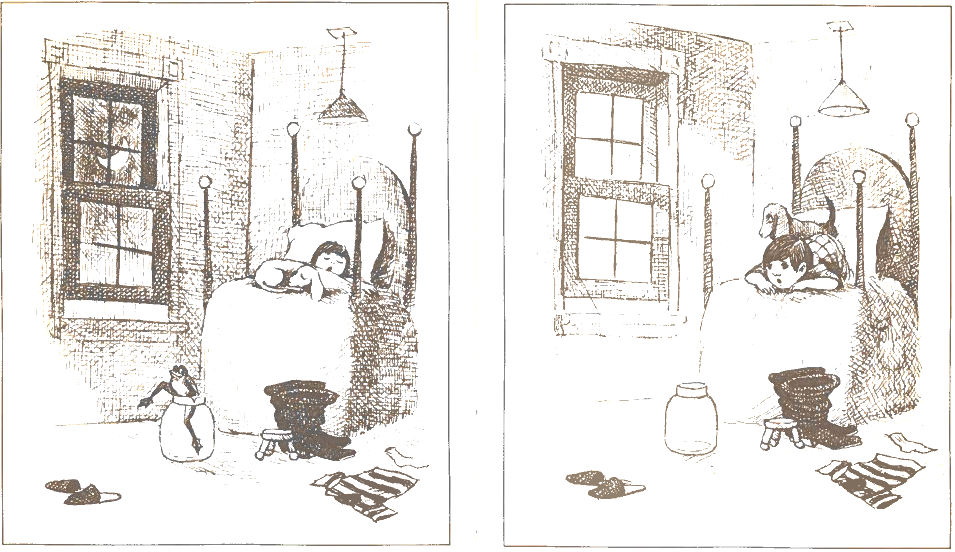


2

11

**C. Inter-rater reliability for the creativity variables**

Table 1 Cronbach’s alpha coefficients (α) for the 10 creativity measures

| Verbal fluency | Verbal originality | Verbal flexibility | Verbal elaboration | Verbal subscore | Figural fluency | Figural originality | Figural flexibility | Figural elaboration | Figural subscore |
| --- | --- | --- | --- | --- | --- | --- | --- | --- | --- |
| .999 | .827 | .967 | .972 | .970 | .938 | .819 | .847 | .821 | .798 |

**D. Correlations analyses for the creativity variables**

Table 2 Correlational coefficients (r) for the 10 creativity variables

|  | **Verbal originality** | **Verbal flexibility** | **Verbal elaboration** | **Verbal subscore** | **Figural fluency** | **Figural originality** | **Figural flexibility** | **Figural elaboration** | **Figural subscore** |
| --- | --- | --- | --- | --- | --- | --- | --- | --- | --- |
| **Verbal fluency** | -.120 | .975** | -.309 | .803** | .164 | -.219 | .017 | -.171 | -.037 |
| **Verbal originality** |  | -.050 | .009 | .230 | -.170 | .230 | .060 | .044 | .012 |
| **Verbal flexibility** |  |  | -.319 | .820** | .160 | -.153 | .028 | -.128 | -.001 |
| **Verbal elaboration** |  |  |  | .202 | -.114 | .236 | -.126 | .356** | .099 |
| **Verbal subscore** |  |  |  |  | .054 | .009 | -.021 | .047 | .038 |
| **Figural fluency** |  |  |  |  |  | -.423** | .690** | -.451** | .568** |
| **Figural originality** |  |  |  |  |  |  | .125 | .776** | .441** |
| **Figural flexibility** |  |  |  |  |  |  |  | -.116 | .848** |
| **Figural elaboration** |  |  |  |  |  |  |  |  | .340** |

*Note*: Considering the large number of correlational analyses, a more conservative alpha level of .01 was adopted in order to reduce the chance of Type I error. ***p* < 0.0

**References**

Mayer, Mercer. 1967. *A boy, a dog and a frog.* New York: Dial Press.

Mayer, Mercer. 1969. *Frog, where are you?* New York: Dial Press.
